# Supplementary material for: Solvent Etching Process for Graphitic Carbon Nitride Photocatalysts Containing Platinum Cocatalyst: Effects of Water Hydrolysis on Photocatalytic Properties and Hydrogen Evolution Behaviors
Source: Nanomaterials (Basel). 2022 Apr 2;12(7):1188. doi: 10.3390/nano12071188 (PMC9000727; doi:10.3390/nano12071188)
Supplement: Supplementary file 1 [file nanomaterials-12-01188-s001.zip › nanomaterials-1650136-supplementary.pdf]

## **Supplementary Materials**

# **Solvent Etching Process for Graphitic Carbon Nitride Photocatalysts Containing Platinum Cocatalyst: Effects of Water Hydrolysis on Photocatalytic Properties and Hydrogen Evolution Behaviors**

**Thi Van Anh Hoang, Thi Kim Anh Nguyen, Duc Quang Dao, Phuong Anh Nguyen, Dong Hwi Jeong and Eun Woo Shin \***

School of Chemical Engineering, University of Ulsan, Daehakro 93, Nam-gu, Ulsan 44610, Korea;

hoangvananh2203@gmail.com (T.V.A.H.); nguyenthikimanhthb@gmail.com (T.K.A.N.);

ddquang221@gmail.com (D.Q.D.); anhphuong.nguyen1150@gmail.com (P.A.N.);

jdonghwi@ulsan.ac.kr (D.H.J.)

\* Correspondence: ewshin@ulsan.ac.kr; Tel.: +82-52-259-2253

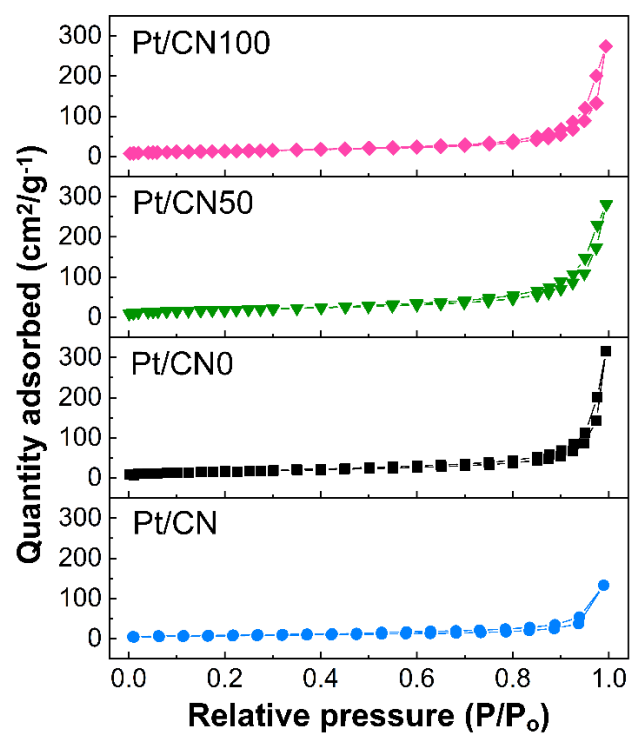

**Figure S1.**  $N_2$  adsorption-desorption isotherms of the prepared catalysts.

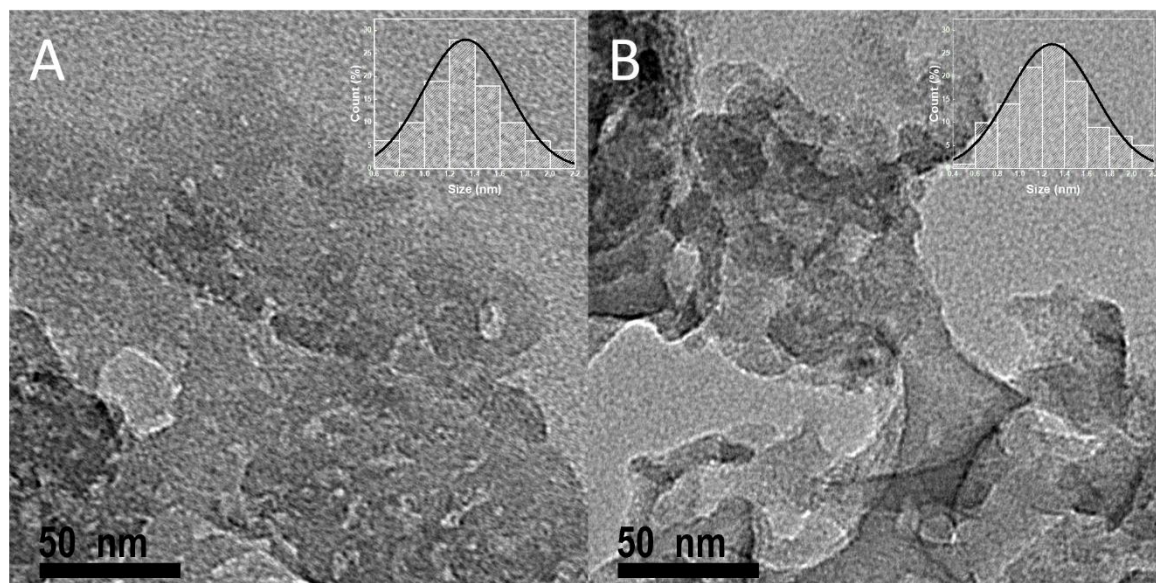

**Figure S2.** TEM images of Pt/CN50 (**A**) and Pt/CN100 (**B**). The inset represents the size distribution of Pt particles.

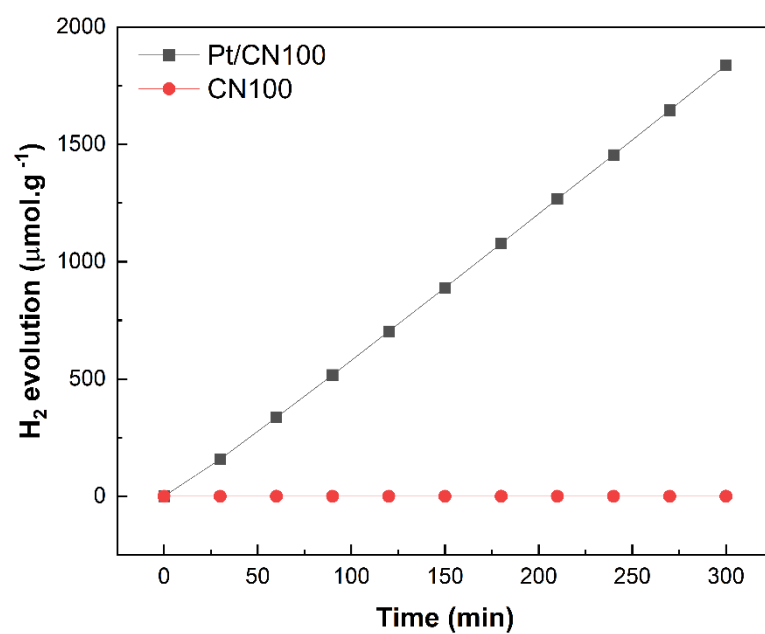

**Figure S3.** H<sub>2</sub> evolution results of Pt/CN100 and CN100 photocatalysts.

**Table S1.** The atomic percentages (at%) of COOH, C=O, and C-OH groups for Pt/CN<sub>x</sub>.

| Sample            | Pt/CN | Pt/CN0 | Pt/CN50 | Pt/CN100 |
|-------------------|-------|--------|---------|----------|
| COOH <sup>a</sup> | 0     | 36.62  | 66.10   | 74.20    |
| C=O <sup>a</sup>  | 100   | 37.03  | 26.88   | 18.15    |
| C-OH <sup>a</sup> | 0     | 26.35  | 7.02    | 7.65     |

<sup>a</sup> The numbers were obtained from the deconvolution of the N 1s XPS data.

**Table S2.** The atomic percentage ratios of Pt<sup>0</sup>/Pt, Pt<sup>2+</sup>/Pt, and Pt<sup>4+</sup>/Pt for Pt/CN<sub>x</sub>.

| Sample               | Pt/CN0 | Pt/CN50 | Pt/CN100 |
|----------------------|--------|---------|----------|
| Pt <sup>0</sup> /Pt  | 0.08   | 0.17    | 0.14     |
| Pt <sup>2+</sup> /Pt | 0.42   | 0.57    | 0.54     |
| Pt <sup>4+</sup> /Pt | 0.50   | 0.25    | 0.32     |
